1 **A qualitative exploration of the psychosocial factors affecting antiretroviral therapy**  
2 **adherence among HIV infected young adults in Eastern Uganda.**

3 Easton Tweekambe<sup>1</sup>, Joshua Eputai<sup>1</sup>, Enid Kagoya Kawala<sup>2</sup>, Vian Namanya<sup>3</sup>, Emmanuel Tiyo  
4 Ayikobua<sup>4</sup>, Samuel Baker Obakiro<sup>5</sup>, Agnes Napyo<sup>2</sup>, Kenedy Kiyimba<sup>5</sup>

5 **Affiliation**

6 <sup>1</sup>Department of Nursing, Faculty of Health Sciences Busitema University, P. O Box 1460, Mbale  
7 Uganda.

8 <sup>2</sup>Department of Community and Public Health, Faculty of Health Sciences, Busitema University,  
9 P.O Box 1460, Mbale, Uganda

10 <sup>3</sup>Department of Pharmacology and Toxicology, School of Pharmacy, Kampala International  
11 University, P.O Box, 20000, Kampala, Uganda

12 <sup>4</sup>Department of Physiology, School of Health Sciences, Soroti University, P.O Box, 211, Soroti  
13 Uganda

14 <sup>5</sup>Department of Pharmacology and therapeutics, Faculty of Health Sciences, Busitema  
15 University, P.O Box 1460, Mbale, Uganda.

16

17 Corresponding Author: Kenedy Kiyimba ([kiyimbakennedy@gmail.com](mailto:kiyimbakennedy@gmail.com),  
18 [kiyimbakennedy@fhs.busitema.ac.ug](mailto:kiyimbakennedy@fhs.busitema.ac.ug) ,+256702807210)

19

20 **ABSTRACT**

21 **Background**

22 The use of anti-retroviral therapy (ART) in management and prevention of HIV/AIDS epidemic  
23 is a globally accepted strategy. In Uganda, despite the efforts to increase uptake of ART,  
24 adherence remains a huge challenge. This study, therefore, was conducted to explore  
25 psychosocial factors which influenced non-adherence to ART among young adults in Eastern  
26 Uganda.

27

28

29

## 30 **Methods**

31 This was an exploratory qualitative study conducted at the ART clinic of Mbale Regional  
32 Referral Hospital. A total of 35 in-depth interviews with young adults who had defaulted from  
33 taking ART drugs were conducted. Also, five key-informant interviews were conducted among  
34 the healthcare workers in the hospital. Thematic analysis approach was followed to analyze the  
35 data using NVIVO software (version 11).

## 36 **Results**

37 Non-adherence to ART was perceived to result from poor social support, poor coping  
38 mechanisms, unpredictable and busy work schedules, poverty, incompatible religious beliefs and  
39 practices. The poor social support factors included poor caregiver support, non-disclosure of  
40 HIV status, stigma and discrimination while factors linked to poor coping mechanisms included  
41 alcohol and substance abuse, psychosocial stress, depression, forgetfulness and feelings of self-  
42 hatred. Poverty limits access to treatment and basic needs including transportation to health  
43 facilities. Long waiting time at the ART clinic was the healthcare system factor which was  
44 thought to cause non-adherence among young adults.

45

46

## 47 **Conclusion**

48 Non-adherence to ART at Mbale Regional Referral Hospital in Eastern Uganda is attributed to  
49 various psychosocial factors such as stigma and discrimination, mental health problems, work-  
50 related problems and low socio-economic status, religious beliefs and poor knowledge, long

51 waiting time in ART clinic and poor family support. Psychosocial counselling should therefore  
52 target the perceived causes of ART non-adherence so as to improve the adherence /compliance to  
53 ART.

54 **Keywords:** Adherence, anti-retroviral therapy, Human Immunodeficiency Virus, Uganda.

## 55 **1.0 Background**

56 HIV/AIDS is still an epidemic with devastating consequences to humanity worldwide.  
57 Globally, an estimated 38.4 million people were living with Human Immune Virus (HIV) in  
58 2021 of which 54% (20.6 million) of the population were in Southern and Eastern Africa [1].  
59 Uganda is one the countries in sub-Saharan Africa with the high burden of HIV infection [2]. In  
60 2021, the prevalence rate of HIV among adults aged 18-49 in Uganda was 5.2% which translated  
61 to about 1.3 million people [2]. Uganda is a predominately young population with significant  
62 public health implications given that the risk of new infections is highest among the young adults  
63 [3]. In Uganda, 37% of all the new HIV infections were among the young adults aged 15-24  
64 years in 2020 [4].

65 The United Nations AIDS (UNAIDS) has set an ambitious 95-95-95 target to eliminate  
66 HIV/AIDS epidemic by 2030 [5]. The 95-95-95 strategy is where 95% of the population are  
67 aware of their HIV status, 95% of HIV positive clients are on antiretroviral treatment (ART), and  
68 subsequently 95% of HIV positive clients on ART are able to achieve HIV viral load suppression  
69 [5]. In Uganda, in 2020, 89% of people living with HIV were aware of their HIV status, 82% of  
70 people living with HIV were on ART, and 78% of people living with HIV had viral suppressed  
71 loads [2]. Consequently, Uganda is far from meeting the 95-95-95 target [2].

72 Optimal elimination of HIV transmission and viral load suppression requires strict adherence to

73 ART [6]. The risk of treatment failure is likely to occur following failure to adhere to the lifelong  
74 ART [7-9]. Young adults are more likely than adults to miss taking ART drugs [6]. A previous  
75 study among youths showed that 37% of the youths living with HIV refused or missed taking  
76 ARVs for a period of one month in Rwanda [10], while another study in Uganda reported that  
77 90% of the youths had more than 95% adherence in taking ART drugs [11]. Poor adherence to  
78 ART was attributed to poverty, stigma, non-disclosure, discrimination, pill burden, fatigue,  
79 depression and side effects [11-17]. Short waiting time, counselling, supportive healthcare  
80 workers, peer support and provision of food and transport was found to facilitate good adherence  
81 practices among the youth [11]. Previous studies explored adherence in the context of married  
82 couples [18], while a few studies among the young adults were quantitative in nature [11]. In this  
83 study, a qualitative research design was used so as to further explore and understand the  
84 psychosocial factors which hindered adherence to ART among young adults living with HIV.

## 85 **2.0 Methods and Materials**

### 86 **2.1 Study design and setting**

87 This study used a phenomenological qualitative study design to explore psychosocial factors  
88 which influenced non-adherence to ART among young adults at the ART clinic of Mbale  
89 Regional Referral Hospital (MRRH). MRRH is the biggest hospital in Eastern Uganda with a  
90 400-bed capacity serving over 16 districts in Eastern Uganda. The ART clinic at the hospital  
91 offers a wide range of services which include health education, HIV counseling and testing, ART  
92 dispensing, laboratory services, clinical assessment, ART adherence counseling and psychosocial  
93 support.

### 94 **2.2 Study Participants**

95 HIV positive young adults from age 19-35 years who were receiving ART in the hospital and  
96 were non-adherent to ART were recruited in the study. Participants who defaulted on ART with  
97 adherence of less than 90% in the past three months were selected and were considered to be  
98 non-adherent to ART.

99 The study also included ART clinic staff purposively selected since they worked so closely with  
100 the young adults. These clinic personnel included a clinical officer, a nurse who was the in-  
101 charge of the ART clinic, a social worker and two primary health care counselors. All the  
102 participant Identifiers were not disclosed nor known to anyone outside the research group.

### 103 **2.3 Sample size calculation**

104 The sample size for this study was based on the principle of data saturation when no new  
105 information was collected from the interview[19]. In this study, data saturation was reached  
106 when a total of 35 in-depth interviews and five key informant interviews were conducted.

### 107 **2.4 Data collection**

108 In-depth interviews (IDIs) were used to collect data from study participants. The interviews were  
109 conducted in Luganda, Lugishu and English. The IDIs were conducted by ET, a nursing student  
110 in the final year of study and a native speaker of Luganda. The interviews were conducted in a  
111 quiet room with adequate privacy. The IDIs with the participants lasted a duration of about 30-45  
112 minutes. A topic guide with open-ended questions were used during the IDIs. The questions  
113 asked included what challenges hindered these clients from adhering well to the recommended  
114 lifestyle of people living with HIV while at school, home, work places, health facility, any illicit  
115 drugs or alcohol use by these clients, feelings of self-hatred, homicidal and suicidal ideas. In  
116 addition, social demographic information including age, sex, marital status, level of education,

117 religion, and time the client has spent on ART were collected. Key informant interviews were  
118 conducted to understand the perceived psychosocial factors for ART non-adherence among  
119 young adults from the lens of experts involved in ART. Key informant interviews, lasted a  
120 duration of about 30-45 minutes, were conducted in English using an interviewer guide. The  
121 interviewer guided contained questions such as what challenges hinder these clients from  
122 adhering well to the recommended lifestyle for people living with HIV while at school, home,  
123 work places, health facility, any illicit drugs or alcohol use by these clients, report feelings of  
124 self-hatred, homicidal, suicidal ideas or any other mental illnesses. Method triangulation, through  
125 use of IDIs and key informant interviews, ensured rigor of the data collected in the study. Audio  
126 recording of the interviews was done.

## 127 **2.5 Data analysis**

128 The audio recording were transcribed word to word from Luganda and Lugishu to English by a  
129 trained native Luganda speaker (ET and EK). NVIVO version 11 plus was used in the data  
130 analysis and processing [20]. Brauna and Clarke thematic analyses was used to analyze the data  
131 [21]. The transcript was read for several times to get familiar with the data [21]. A  
132 multidisciplinary team of researchers including a social worker, nurse, counsellor and a  
133 pharmacologists) were involved in data analysis. The codes generated were discussed by the  
134 team to ensure that the codes were grounded and consistent with the data. The interviews were  
135 then read by the social scientist (EK) who randomly selected and independently coded three  
136 interviews [21]. Codes, sub-themes, and themes were used to describe the data [21].

## 137 **2.6. Ethical clearance.**

138 Ethical approval from Mbale Regional Referral Hospital Ethics and Research Committee  
139 (reference number: MRRH-2021-82) was obtained. Informed consent was obtained from  
140 individual participants, while confidentiality and privacy were strictly followed; the participant  
141 Identifiers(IDs) were not known to anyone outside the research group. The study was conducted  
142 during COVID-19 pandemic, and as such, compliance to standard operating procedures were  
143 strictly maintained during data collection.

## 144 **3.0 Results**

### 145 **3.1 Study participant demographics**

146 A total of thirty-five young adults living with HIV were enrolled in the study. The participants  
147 included those who had an adherence of less than 90% in the period of the last three months  
148 (table 1). The work experience of key-informants ranged from two to eight years.

149 **Table 1: Description of Socio demographic characteristics of participants from IDIs**

| <b>Demographics</b>       | <b>Frequency(N=35)</b> | <b>Percentage (%)</b> |
|---------------------------|------------------------|-----------------------|
| <b>Age</b>                |                        |                       |
| 19-24                     | 14                     | 40.0                  |
| 25-30                     | 8                      | 22.9                  |
| 30-35                     | 13                     | 37.2                  |
| <b>Gender</b>             |                        |                       |
| Female                    | 20                     | 57.1                  |
| Male                      | 15                     | 42.9                  |
| <b>Level of education</b> |                        |                       |
| Primary or no education   | 14                     | 40.0                  |
| Secondary                 | 16                     | 45.7                  |
| Tertially                 | 5                      | 14.3                  |

150

151

152

153 **3.2: Psychosocial factors perceived to influence ART non-adherence.**

154 Five themes embodied the perceived psychosocial of ART non-adherence: poor social support,  
 155 religious beliefs, poor coping mechanisms, poverty and unpredictable schedules, and health  
 156 system related factors (table 2).

157 **Table 2: psychosocial factors influencing ART adherence**

| <b>Codes</b>                                                                                                                                                              | <b>Sub-themes</b>              | <b>Themes</b>          |
|---------------------------------------------------------------------------------------------------------------------------------------------------------------------------|--------------------------------|------------------------|
| I fear being seen by my fellow workers swallowing drugs.<br>Feared carrying drugs on the burial.                                                                          | Stigma                         | Poor social support    |
| I have not told my spouse about my status<br>My boss does not know about my status<br><br>I stay with my in-law and my sibling but my in-law doesn't know about my status | Non-disclosure                 |                        |
| I don't talk to that person, he is positive.<br>I don't associate with that person, he is positive.                                                                       | Discrimination                 |                        |
| Found when my parent had locked the house<br>My both parents and my siblings all died<br>My spouse is abroad, I stay in my house alone                                    | Poor caregiver support         | Poor coping mechanisms |
| I take alcohol, I like it takes away my stress                                                                                                                            | Alcoholism and substance abuse |                        |
| When I fail to get customers, I be stressed, don't swallow my drugs<br>Have been stressed, have missed for a week                                                         | Psychosocial stress            | Depression             |
| Youths who are severely depressed don't find use of swallowing drugs.                                                                                                     | Depression                     |                        |
| I forgot my appointment date<br>I forgot to take my medicine;                                                                                                             | Forgetfulness                  |                        |



|                                                                                                                                                                                            |                               |                                           |
|--------------------------------------------------------------------------------------------------------------------------------------------------------------------------------------------|-------------------------------|-------------------------------------------|
| thought I had swallowed yet I had not                                                                                                                                                      |                               |                                           |
| I don't care, am already infected                                                                                                                                                          | Thoughts of self-hatred       |                                           |
| In school, only eat lunch and supper, posho and beans, which is not enough<br>I eat one meal a day, sometimes lunch, sometimes supper.<br>Swallowing drugs without eating makes you dizzy. | Poor feeding                  | Poverty and unpredictable work schedules. |
| I foot to the facility<br>Transport costs have been high especially during covid-19.                                                                                                       | Lack of transport             |                                           |
| My work days were extended, couldn't travel<br>It rained on me while I had gone for work, drugs were in my pocket and they got smashed                                                     | Un-predictable work schedules |                                           |
| Sometimes busy doing house work, I forget<br>Time for swallowing reaches when am still in town<br>Swallowing time reaches when am still in prep                                            | Busy work schedules           |                                           |
| We don't have enough money at home<br>Our funders have not sent us money for last 3 months<br>We sometimes struggle for a meal in a day<br>Student life is hard, you don't have money.     | Poverty                       |                                           |
| Some Muslims don't swallow their drugs during Ramathan                                                                                                                                     | Fasting                       | Incompatible religious beliefs            |
| Some pastors preach that it's GOD who heals.                                                                                                                                               | Wrong preaching               |                                           |
| Had malaria, stopped taking drugs for the time I was on anti-malarial drugs                                                                                                                | Knowledge gap                 |                                           |

|                                                                                              |                    |                            |
|----------------------------------------------------------------------------------------------|--------------------|----------------------------|
| Waiting time here at the facility is long<br>When people are many, they delay working on you | Long waiting hours | Health care system factors |
|----------------------------------------------------------------------------------------------|--------------------|----------------------------|

158

### 159 **3.2.1. Theme1: Poor social support**

#### 160 **3.2.1.1 Stigma**

161 Some clients attributed missing swallowing their ART medicines to fear of being seen by  
162 friends, partner, relatives, and workmates. Fear of being seen taking medications was mostly  
163 expressed by students in school, and participants who resided with their fellow colleagues.

164 *“I am a housekeeper in a hotel, we sleep in a dormitory together with my other colleagues, I hide  
165 and swallow my medicine like at 9:00 am such that my workers don’t see me”, (IDI-15, with  
166 inconsistency in time of swallowing)*

167 *“I am a track driver, sometimes I get a customer in my lorry and time for swallowing reaches, I  
168 only have to stop the lorry, move out as if I am going to urinate as I swallow my tablet without  
169 the customer seeing me” (IDI-09, missed about 5 times in last 3 months)*

170 The young adults in schools feared swallowing or picking drugs from their suitcase cases when  
171 fellow students were seeing them.

172 *“I am a boarding student, I wake up very early in the morning, put my medicine in my pocket,  
173 swallow them at around 10 am when I feel I am in a private place”. (IDI-25, missed 5 times  
174 while at school)*

175 *“I missed about 5 times while I was at school because I feared fellow students to see me picking  
176 my drugs from my suitcase”, (IDI-17)*

177 *“At our school I swallow my drugs from the sickbay but it’s near a boy’s dormitory. Fellow*  
178 *students keep wondering why I have to go to the sick bay on a daily basis”, (IDI-32 missed 10*  
179 *tablets in 3 months)*

180 Some clients reported that events that occur abruptly make them fail to adhere well to taking  
181 their drugs and honor appointments. Abrupt burials were perceived to cause some clients to miss  
182 taking their ART treatment because of stigma and fear from being seen taking drugs by others

183 *“I had gone for the burial, I feared carrying my medicines”, (IDI- 09, missed 3 tablets).*

#### 184 **3.2.1.2 Non-disclosure.**

185 Non-adherence to ART medications were attributed to failure of the clients to disclose their HIV  
186 status to their partners, relatives and neighbors, and the fact that they were taking their ART  
187 medications. Because of non-disclosure, the clients could not take their medications in the  
188 presence of the relative, and consequently were not consistent in taking the medications at the  
189 required time.

190 *“I have so far spent 6 months on treatment, I have not told my spouse about my status, I hide and*  
191 *swallow my medicine when he is not seeing me or wait and swallow when he is not around”*  
192 *(IDI-16, reported inconsistencies in time of swallowing)*

193 *“I stay with my sibling together with my in-law at their home. My in-law doesn’t know about my*  
194 *status and we don’t want him to know about it. I swallow my medicine at 9:00 am and if he*  
195 *delays to go for work, I wait until he goes for work then swallow my medicine such that he*  
196 *doesn’t see me.” (IDI-17)*

#### 197 **3.2.1.3 Discrimination**

198 Some key informants perceived that HIV positive clients were discriminated against by the  
199 society, which the key informants thought promoted poor adherence practices among the clients.  
200 Clients who were discriminated were perceived to fail to take their ART medications because the  
201 lack of social approval led to poor coping mechanisms including self-hatred.

202 *“I don’t talk to that person, he is positive”, “I don’t associate with that person, he has HIV”,*  
203 *(KI- 03, counselor for 3 years at the clinic).*

## 204 **3.2.2 Theme 2: Poor coping mechanisms**

### 205 **3.2.2.1 Stress**

206 Work-related stress was perceived to cause non-adherence to ART medications, while stress  
207 related to financial insecurities was attributed to cause poor adherence practices in some of the  
208 clients.

209 *“I rent in town and my funders have spent 3 months without sending us rent for the last three*  
210 *months. This has always stressed me and so far, I have skipped swallowing for the whole of last*  
211 *week”, (IDI-14)*

212 *“I work in a saloon here in town, sometimes I fail to get customers for a day, I go back home*  
213 *when I am stressed and fail to swallow my medication”, (IDI- 07)*

### 214 **3.2.2.2. Forgetfulness**

215 Poor timing of taking ART drugs, missing taking the drugs, and missed appointments were partly  
216 attributed to forgetfulness by the clients.

217 “I missed one tablet in the last 3 months, I forgot to take, me thought I had taken yet I had not”,  
218 (IDI-10)

219 “I was supposed to return yesterday for more drugs but I forgot the return date”, (IDI-04,  
220 missed appointment).

221

222

### 223 **3.2.2.3. Depression**

224 Key informants reported that clients who were newly diagnosed with HIV infection lost hope  
225 and sometimes were severely depressed which made the clients to stop taking ART medications.

226 “Severely depressed clients don’t find the use of swallowing drugs until they are given various  
227 sessions of psychosocial counselling”, (KI-03, counselor for 3 years at the clinic).

### 228 **3.2.2.4 Alcoholism and substance abuse**

229 Non-adherence to ART was attributed to alcohol intake as it affected the cognition of the clients  
230 and made the clients to forget to take their medicines or even delay to return back home to take  
231 their drugs.

232 “I take alcohol because I like it and it takes away my stress. However, it has made me miss  
233 several times since I forget. Sometimes I deliberately refuse to take these medicines whenever I  
234 am drunk. I missed very many times because I always get drunk”, (IDI-14)

### 235 **3.2.2.5. Thoughts of self-hatred.**

236 Poor adherence was attributed to ill-thoughts about HIV infection that made some clients miss  
237 swallowing the medication since they did not care, they were already infected

238 *“I don’t care, I am already infected”. (IDI- 14, missed very many times)*

239

240

241

### 242 **3.2.3 Theme 3: Poverty and unpredictable work schedules**

#### 243 **3.2.3.1 Poverty**

244 Nutrition and good feeding is important for HIV clients who are on ART medications. Lack of  
245 money to afford basic needs such as food was perceived to make clients to skip or miss taking  
246 the ART medications. Clients were not able to honor their appointments to come to the facility to  
247 pick their ART because of the lack of transport fares. Clients claimed that they failed to raise  
248 money for transport to keep appointment dates during COVID-19 especially with increased taxi  
249 fares during covid-19 lockdown where transport fares were doubled.

250 *“I stay with my parent, we don’t have enough money, sometimes we sleep without having*  
251 *supper”, (IDI-21, missed once in last 3 months)*

252 *“Our funders have spent 3 months without sending us money, I am stressed that’s why I have*  
253 *been skipping”, (IDI-14, missed very many time)*

254 *“We don’t have enough funds at home, we even struggle to have one meal a day”, (IDI-08)*

255 “Covid-19 restrictions have made transport fares high, if I delay at the facility, I end up using  
256 15000UGX to 20000UGX (4.24\$ to 5.65\$) on a boda-boda which is very expensive for me”,  
257 (IDI- 03, missed appointment date)

258 “Student life when you have nothing to eat is very hard, it’s harder to swallow drugs when you  
259 are dizzy and hungry”, (IDI-13.)

### 260 **3.2.3.3 Poor feeding.**

261 Related to poverty, failure to adhere to ART medications at home was attributed to lack of food.  
262 The clients appreciated that ART drugs required good feeding at least breakfast, lunch, dinner  
263 and supper and also the need for adequate fluid intake. s. Some clients claimed that they felt well  
264 when the drugs were taken using good juice and not with plain water. Respondents from  
265 secondary schools especially those in boarding reported poor feeding practices including lack of  
266 a balanced diet at schools and inadequate breakfast while some ate only lunch and supper with  
267 poor quality of food. Clients reported that was difficult for them to take the ART drugs when  
268 they were hungry since the drugs would make one dizzy.

269 “It’s hard for me to find what to eat while I am in this town, I eat breakfast and one more meal  
270 for a day, and sometimes I do only lunch and sometimes do only supper.” (IDI-14, missed very  
271 many times)

272 “I could miss the drugs especially when I have nothing to eat”, (IDI-07)

273 “I am always weak at school, I only feed on posho and beans which is always little for me”,  
274 (IDI-25)

275 *“I am in boarding school, we always have only 2 meals a day lunch and supper where we only*  
276 *eat posho and beans, I am not always satisfied that’s why I end up swallowing poorly”, (IDI-11)*

277 *“Sometimes I have no food these days and these drugs make me feel dizzy when I take them on*  
278 *an empty stomach”, (IDI-12)*

279 *“I stay with my parent who has been on treatment for so long, my parent died, sometimes I sleep*  
280 *without having supper, I only ensure that my young baby has eaten”, (IDI- 21).*

281

### 282 **3.2.3.2 Unpredictable work schedules**

283 Unpredictable work schedules and prolonged duration of work away from home was reported to  
284 cause some clients to miss taking their medications. These clients were not very sure of the  
285 number of days they would spend at their workplaces thus ended up missing since their work  
286 places were very far thus could not pick tablets for extra days.

287 *“I missed about 6 tablets in the last 3 months because whenever I get work, my work days are*  
288 *extended yet home is always far for me to go back and I pick my medicines”, (IDI-34)*

289 *“I had gone for work, carried about 5 tablets in my pocket that I would use during that period, it*  
290 *rained on me and they all smashed, couldn’t come back home to pick more drugs because it was*  
291 *very far,” (IDI-09, missed 5 tablets)*

### 292 **3.2.3.4. Busy schedules**

293 Some clients attributed the poor timing and failure to swallow the drugs well to busy schedules at  
294 home. They ended up getting caught up in other activities thus delaying to swallow the drugs



295 well and thus poor adherence. Busy schedules also affected young adults who were in school  
296 where a lot of time was spent in class and preps and poor time keeping of school activities meant  
297 that the time of taking the drugs collided with school activities.

298 *“I am sometimes busy doing house work at home, and thus my time has not been constant*  
299 *10:00pm”, (IDI-22)*

300

301

302 *“My time for taking, 9:00 am, reaches when I am already needed in town, thus have to take my*  
303 *medications before that time such that I don’t miss”, (IDI-18)*

304 *“I am in a boarding school, sometimes I miss coming for review because of tight school*  
305 *programs and I have to send someone to come and pick for me the medicine”, (IDI-03)*

306 *“In school, my time 10:00pm collides with prep time, sometimes I am still in class or still*  
307 *discussing with my classmates”, (IDI-22, reports inconsistencies in timing)*

#### 308 **3.2.4 Theme 4: Incompatible religious beliefs**

309 Key informants attributed religious belief to cause clients to miss taking their ART medications.  
310 The staff reported that some religious leaders were a burden to good adherence of their clients  
311 and also their religious affiliations.

312 *“Some pastors whom they believe in lie them that God will heal them even when they don’t take*  
313 *drugs, and thus clients will end up stopping to swallow their medications well waiting for*  
314 *miracles”. (KI -05)*

315 *“Some Muslims on ART stop swallowing their drugs during Ramathan. They miss due to*  
316 *fasting”, (KI-04)*

### 317 **3.2.5.3 Knowledge gap**

318 Some clients missed swallowing drugs due to lack of adequate knowledge regarding the need to  
319 continue taking medication regardless of their health status. Some participants stopped taking  
320 ART medications when they were sick and on other treatments, and resumed taking ART  
321 medications after completing taking medications of other illness.

322 *“I was on treatment for malaria, I decided to finish drugs for malaria and resume ARVs later”,*  
323 *(IDI-26, missed 6 tablets in last 3 month).*

### 324 **3.2.5. Theme 5: Family support**

#### 325 **3.2.5.1. Poor family support**

326 Some respondents who lacked caring marriage partners, parents and relatives were finding  
327 problems in adhering well to ART. Clients sometimes forgot to swallow their medicines and  
328 were not reminded by their partners leading to inconsistent timing and or missing to take the  
329 drugs.

330 *“Missed once, returned home very early in the morning, found when my parent had locked the*  
331 *house, couldn't find my drugs since they were locked inside our house”, (IDI- 21)*

332 *“My parents both died together with my siblings and I am the only one living, I stay with my*  
333 *relative and his spouse, sometimes I fail to get what to eat”, (IDI-17.)*

334 *“My spouse went and he works abroad, I am the first borne but I stay alone in my house, I left*  
335 *my parents. Sometimes I forget swallowing”, (IDI-09)*

336 Poor adherence among the married young adults was attributed to unfaithful partners. Some  
337 women claimed that whenever their spouses failed to fulfill their family obligations of providing  
338 for the family, they ended up stressed and missed taking the pills for some days.

339 *“I stay together with my spouse and my two children who are all on treatment. My spouse*  
340 *always cheats on me, we end up lacking money, I am always stressed about it”, (IDI- 24)*

341

342

#### 343 **4.0 DISCUSSION**

344 This study was conducted to explore the psychosocial factors that hindered adherence ART  
345 among HIV positive young adults. Non-adherence to ART was perceived to result from stigma  
346 and discrimination, mental health problems, work-related problems and low socio-economic  
347 status, religious beliefs and poor knowledge, healthcare system factors and poor family support.  
348 Addressing these psychosocial factors hindering adherence to ART would promote increased  
349 compliance to treatment and hence reduced morbidity and mortality form HIV/AIDS. Stigma  
350 and discrimination were described to affect all young adults on care and it was among the most  
351 common reasons of failure to swallow the pills while at school, work places, and homes. Stigma  
352 is due to perceived unbearable burden for taking medication for life which lessens the self-  
353 confidence of the clients leading to non-adherence [11, 15]. Stigma in the healthcare facilities  
354 manifests in form of internalized fear of being seen in ART clinic, impatience to wait, and rush

355 in picking the drugs [15]. A study done in Northern Uganda among young adults also reported  
356 stigma as the main cause of non-adherence to ART [11]. Similar findings have been reported in  
357 Myanmar, where enacted stigma and internalized stigma were associated with worse ART  
358 adherence [13]. Stigma and discrimination restrict the freedom of HIV positive in taking their  
359 ART pills in the presence of other people resulting in delaying, poor timing and non-adherence  
360 to ART. Stigma remains a stumbling block to good adherence and its impact is not only reflected  
361 on the recipients of care but also on their care takers, communities, and the entire health care  
362 system [15]. The consequent poor counselling and inadequate holistic health assessment of the  
363 client worsens adherence practices but may also contribute to ART failure [15].

364

365 Disclosure of HIV status has remarkable benefits in promoting drug adherence among other  
366 social benefits[22, 23]. In our study, clients who had not disclosed their HIV status found it  
367 difficult to ask permission from their superiors to allow them to go and pick their medication  
368 from the health facility. Missed appointments, poor timing and skipping to take their medication  
369 was noted among students who had not disclosed their HIV status as they were unable to seek  
370 permission, special consideration in terms of meals, and receiving adequate social support from  
371 the school manned clinic. Similar findings were cited in Ghana where non-disclosure led to low  
372 adherence on ART [12]. Non-adherence was significantly more common among clients who had  
373 not disclosed their HIV status to their partners, a finding which was consistent with study  
374 findings [12]. Therefore, clients who have not disclosed their HIV status should be counselled on  
375 the role of disclosure in improve adherence to ART.

376 Consistent with previous studies [14, 16, 24], failure to adhere to ART was attributed to mental  
377 health problems including stress, depression, feelings of self-harm, poor coping mechanisms and  
378 use of illicit drugs. In Malawi, young adults who had depressive symptoms were significantly  
379 more likely to default on their ART medication [25]. Like in previous studies [14, 24], newly  
380 diagnosed HIV positive clients were more likely to resort to the use of alcohol and other illicit  
381 drugs to cope with the associated psychosocial stress. Alcohol and substance intake affects social  
382 cognition and lowers social inhibition of the clients leading to forgetfulness, irrational behaviors  
383 and decisions which consequently comprise the ability of HIV positive clients to adhere to their  
384 medications [14]. Promoting adherence requires strong psychosocial counselling services to  
385 screen, identify, and appropriately manage clients who are likely to start using drugs and as well  
386 clients who are already abusing drugs.

387 Previous studies have indicated that long waiting time in ART clinics was significantly  
388 associated with poor ART drug adherence [26, 27]. A study revealed non-adherence to ART was  
389 attributed to long waiting time in 24% of clients [27]. Consistent with previous studies [28], long  
390 waiting times and high volume of clients in ART clinics meant that some clients did not honor  
391 their appointments, while some clients spent so much time in the clinic, and chose to leave the  
392 clinic without receiving their drugs. The high volume of patients relative to the few healthcare  
393 workers compromises on the quality of client-healthcare worker interaction, privacy, poor  
394 quality of care, and failure of the healthcare workers to identify issues of ART adherence among  
395 clients [28]. Measures should be developed to reduce long waiting times in ART clinics so as to  
396 reduce issues of non-adherence to medications and consequent treatment failure

397 Consistent with findings from previous studies[28, 29], poverty, and low-socio economic status  
398 contributed to the ART non adherence among HIV young adults. In a scoping review of the

399 factors contributing to ART adherence, logistical and financial support to HIV positive clients  
400 were found to facilitate adherence to ART medication [30], which also supports our findings.  
401 Non-adherence from lack of money was attributed to failure of the clients to afford basic needs  
402 such as food and transport fares to cater for additional demands of taking ART medications.  
403 COVID-19 restrictions were attributed to cause poor ART drug adherence related to financial  
404 insecurity from closure of business, non-paid leave, laying off workers, and doubling of transport  
405 fares. Financial hardships together with poor quality of meals at schools meant that while in  
406 school students were not able to buy additional food to supplement their feeding and  
407 consequently cope with the demands of taking ART medications. This underscores a need for  
408 schools to provide special support to HIV positive clients in school through provision of special  
409 meals in order to promote drug adherence.

410 Some religious beliefs were perceived to be associated with poor adherence to ART medication.  
411 Some Muslim clients were implored to stop taking their medication during Ramadan, while some  
412 pastors gave false hope to their followers that God would heal them even when they do not take  
413 medication. The findings of our study were in agreement with a study findings [31, 32] which  
414 cited poor ART adherence was related beliefs in faith healing, alternative traditional medication,  
415 and perceptions that HIV was caused by witchcraft . However, this was contrary to the findings  
416 in Ghana, where religious beliefs empowered the clients to ignore stigma, become resilient and  
417 motivated to take their medications because of their beliefs that God approved the use of ART  
418 thus promoting good adherence [33].

## 419 **6.0 Conclusion**

420 Poor timing of taking medication, missed appointments to pick medications, and defaulting in  
421 taking ART medication was perceived to result from stigma and discrimination, mental health  
422 problems, work-related problems and low socio-economic status, religious beliefs and poor  
423 knowledge, long waiting time in ART clinic and poor family support. Mental health problems  
424 including stress, alcohol and substance use, and depression were perceived to negatively affect  
425 drug adherence. There is need for continuous counselling of young adults living by the  
426 Healthcare providers on, mental health, ART adherence, healthy lifestyle, and prompt  
427 management of ART side-effects.

#### 428 **Abbreviations**

429 AIDS; Acquired Immunodeficiency Syndrome, ARV; Antiretroviral drugs, ART; Antiretroviral  
430 therapy, HIV; Human immunodeficiency Virus, MRRH; Mbale Regional Referral Hospital,  
431 HMIS: Health Management Information System, IDI; in-depth interviewees, KI; key informants

#### 432 **Declarations: The authors have no conflict interest to declare**

#### 433 **Ethics approval and consent to participate**

434 Ethical approval was sought from the Research and Ethics committee of Mbale Regional  
435 Referral Hospital. Each participant was made aware that participation is voluntary and that they  
436 can opt out of the study at any stage without any penalty. The information shared with the  
437 investigator was kept confidential and private by restricting any data access. To maintain  
438 privacy, names and any other individual identification were not recorded but unique in-depth  
439 interviewee identification numbers and key informant numbers were used in participant  
440 identification. Informed consent was sought before data collection from a participant and

441 participants were asked to append their signatures on the consent form. All participants were  
442 well educated about the objectives of the study, any risks and benefits.

#### 443 **Consent for publication**

444 Not applicable

#### 445 **Availability of data and materials**

446 The datasets used and/or analyzed during the current study are available from the corresponding  
447 author on reasonable request.

#### 448 **Competing interests**

449 The authors declare that they have no competing interests

450 **Funding:** The study did not receive any funding

451

#### 452 **Authors' contributions**

453 ET conceived the idea, JE, EKK contributed in data collection, data analysis and interpretation,  
454 VN, EAT, SBO, AN, KK participated in writing of the manuscript. All authors read and  
455 approved the final manuscript.

456 **Acknowledgements:** We are grateful to Mbale Regional Referral Hospital, the key informants  
457 and the study participants for their valuable input in the study

458

459

460

## **REFERENCES**



- 461 1. UNAIDS. 2020. *Global HIV & AIDS statistics — Fact sheet*. Available at  
462 <https://www.unaids.org/en/resources/fact-sheet>. Last accessed on 06th Aug 2022. .
- 463 2. UNAIDS. *Global data on HIV epidemiology and response. Country Fact Sheet: Uganda*  
464 2021. Available at <https://aidsinfo.unaids.org/>. Last accessed on 06th Aug 2022.
- 465 3. Mafigiri, R., et al., *HIV prevalence and uptake of HIV/AIDS services among youths (15–*  
466 *24 Years) in fishing and neighboring communities of Kasensero, Rakai District, South*  
467 *Western Uganda*. BMC public health, 2017. **17**(1): p. 1-10.
- 468 4. UNAIDS. *HIV and AIDS Response 2020. Factsheet -Facts on HIV and AIDS in Uganda*  
469 2021. <https://uac.go.ug/media/attachments/2021/09/13/final-2021-hiv-aids-factsheet.pdf>  
470 Last accessed on 06th Aug 2022. .
- 471 5. UNAIDS (2015). *Understanding Fast-Track: Accelerating action to end the AIDS*  
472 *epidemic by 2030*. Available at  
473 [https://www.unaids.org/sites/default/files/media\\_asset/201506\\_JC2743\\_Understanding](https://www.unaids.org/sites/default/files/media_asset/201506_JC2743_Understanding_FastTrack_en.pdf)  
474 [FastTrack\\_en.pdf](https://www.unaids.org/sites/default/files/media_asset/201506_JC2743_Understanding_FastTrack_en.pdf). Last accessed on 06th Aug 2022. .
- 475 6. Gill, M.M., et al., *Adherence challenges and opportunities for optimizing care through*  
476 *enhanced adherence counseling for adolescents with suspected HIV treatment failure in*  
477 *Kenya*. BMC Health Services Research, 2022. **22**(1): p. 1-11.
- 478 7. Natukunda, J., et al., *Virologic failure in HIV-positive adolescents with perfect adherence*  
479 *in Uganda: a cross-sectional study*. Tropical medicine and health, 2019. **47**(1): p. 1-10.
- 480 8. Prasitsuebsai, W., et al., *Adherence to antiretroviral therapy, stigma and behavioral risk*  
481 *factors in HIV-infected adolescents in Asia*. AIDS care, 2018. **30**(6): p. 727-733.
- 482 9. Peltzer, K. and S. Pengpid, *Socioeconomic factors in adherence to HIV therapy in low-*  
483 *and middle-income countries*. Journal of health, population, and nutrition, 2013. **31**(2): p.  
484 150.
- 485 10. Smith Fawzi, M.C., et al., *Mental health and antiretroviral adherence among youth living*  
486 *with HIV in Rwanda*. Pediatrics, 2016. **138**(4).
- 487 11. Nabukeera-Barungi, N., et al., *Adherence to antiretroviral therapy and retention in care*  
488 *for adolescents living with HIV from 10 districts in Uganda*. BMC infectious diseases,  
489 2015. **15**(1): p. 1-10.
- 490 12. Ankrah, D.N., et al., *Facilitators and barriers to antiretroviral therapy adherence among*  
491 *adolescents in Ghana*. Patient preference and adherence, 2016. **10**: p. 329.
- 492 13. Aung, S., et al., *Stigma Determines Antiretroviral Adherence in Adults With HIV in*  
493 *Myanmar*. JAIDS Journal of Acquired Immune Deficiency Syndromes, 2022. **89**(1): p.  
494 19-26.
- 495 14. Kalichman, S.C., et al., *HIV-related stigma and non-adherence to antiretroviral*  
496 *medications among people living with HIV in a rural setting*. Social science & medicine  
497 (1982), 2020. **258**: p. 113092.
- 498 15. Nyblade, L., et al., *Stigma in health facilities: why it matters and how we can change it*.  
499 BMC medicine, 2019. **17**(1): p. 1-15.
- 500 16. Pokhrel, K.N., et al., *Mental health disorders and substance use among people living*  
501 *with HIV in Nepal: their influence on non-adherence to anti-retroviral therapy*. AIDS  
502 care, 2019. **31**(8): p. 923-931.
- 503 17. Spreckelsen, T.F., et al., *Adolescence and the risk of ART non-adherence during a*  
504 *geographically focused public health intervention: an analysis of clinic records from*  
505 *Nigeria*. AIDS care, 2022. **34**(4): p. 492-504.

- 506 18. Ngabirano, T., et al., *Psychosocial adaptation and ART adherence of HIV-infected adults*  
507 *at an urban ambulatory clinic in Uganda*. J Psychol Psychother, 2016. **6**(236): p. 2161-  
508 0487.10002.
- 509 19. Polit, D.F. and C.T. Beck, *Nursing research: Principles and methods*. 2004: Lippincott  
510 Williams & Wilkins.
- 511 20. Castleberry, A., *NVivo 10 [software program]. Version 10*. QSR International; 2012.  
512 2014, American Journal of Pharmaceutical Education.
- 513 21. Braun, V. and V. Clarke, *Using thematic analysis in psychology*. Qualitative research in  
514 psychology, 2006. **3**(2): p. 77-101.
- 515 22. Osingada, C.P., et al., *Disclosure of parental HIV status to children: experiences of*  
516 *adults receiving antiretroviral treatment at an urban clinic in Kampala, Uganda*. AIDS  
517 research and treatment, 2017. **2017**.
- 518 23. Dessie, G., et al., *The effect of disclosure on adherence to antiretroviral therapy among*  
519 *adults living with HIV in Ethiopia: a systematic review and meta-analysis*. BMC  
520 infectious diseases, 2019. **19**(1): p. 1-8.
- 521 24. Daskalopoulou, M., et al., *Non-disclosure of HIV status and associations with*  
522 *psychological factors, ART non-adherence, and viral load non-suppression among*  
523 *people living with HIV in the UK*. AIDS and Behavior, 2017. **21**(1): p. 184-195.
- 524 25. Spielman, K.L., et al., *Depressive symptoms, HIV-related stigma and ART adherence*  
525 *among caregivers of children in vulnerable households in rural southern Malawi*. Plos  
526 one, 2021. **16**(3): p. e0247974.
- 527 26. Sefah, I.A., et al., *Barriers and facilitators of adherence to antiretroviral treatment at a*  
528 *public health facility in Ghana: a mixed method study*. Hospital Practice, 2022. **50**(2): p.  
529 110-117.
- 530 27. Karki, J. and S. Shakya, *Problems Faced by Antiretroviral (ARV) Drug Users in*  
531 *Kathmandu*. Journal of Nepal Health Research Council, 2016. **14**(32): p. 27-32.
- 532 28. Venables, E., et al., *" they just come, pick and go." the acceptability of integrated*  
533 *medication adherence clubs for HIV and non communicable disease (NCD) patients in*  
534 *Kibera, Kenya*. PLoS One, 2016. **11**(10): p. e0164634.
- 535 29. Dear, N., et al., *Routine HIV clinic visit adherence in the African Cohort Study*. AIDS  
536 research and therapy, 2022. **19**(1): p. 1-12.
- 537 30. Kvarnström, K., et al., *Factors contributing to medication adherence in patients with a*  
538 *chronic condition: a scoping review of qualitative research*. Pharmaceutics, 2021. **13**(7):  
539 p. 1100.
- 540 31. Badahdah, A.M. and D.E. Pedersen, *"I want to stand on my own legs": a qualitative*  
541 *study of antiretroviral therapy adherence among HIV-positive women in Egypt*. AIDS  
542 care, 2011. **23**(6): p. 700-704.
- 543 32. Bukenya, D., et al., *What causes non-adherence among some individuals on long term*  
544 *antiretroviral therapy? Experiences of individuals with poor viral suppression in*  
545 *Uganda*. AIDS Research and Therapy, 2019. **16**(1): p. 1-9.
- 546 33. Abdulai, M.A., et al., *A qualitative analysis of factors influencing antiretroviral*  
547 *adherence among persons living with HIV in Ghana*. Journal of Community & Applied  
548 Social Psychology, 2022. **32**(1): p. 135-150.

549
